# Supplementary material for: Topoisomerase I (TOP1) dynamics: conformational transition from open to closed states
Source: PubMed Central journal article supplement (PMC8748870; doi:10.1038/s41467-021-27686-7), 2022-01-10
Supplement: 41467_2021_27686_MOESM1_ESM.pdf [file 41467_2021_27686_MOESM1_ESM.pdf]

### Supplementary Table 1: Codon-optimized genes

Sequence of the codon-optimized genes used in this study. The sequences of the His-tag and the cleavage site (blue) and the sequence of the gene (black) are shown.

| Codon-Optimised gene                | Sequence                                                                                                                                                                                                                                                                                                                                                                                                                                                                                                                                                                                                                                                                                                                                                                                                                                                                                                                                                                                                                                                                                                                                                                                                                                                                                                                                                                                                                                                                                                                                                                                                                                                                                                                                                                                                                                                                                                              |
|-------------------------------------|-----------------------------------------------------------------------------------------------------------------------------------------------------------------------------------------------------------------------------------------------------------------------------------------------------------------------------------------------------------------------------------------------------------------------------------------------------------------------------------------------------------------------------------------------------------------------------------------------------------------------------------------------------------------------------------------------------------------------------------------------------------------------------------------------------------------------------------------------------------------------------------------------------------------------------------------------------------------------------------------------------------------------------------------------------------------------------------------------------------------------------------------------------------------------------------------------------------------------------------------------------------------------------------------------------------------------------------------------------------------------------------------------------------------------------------------------------------------------------------------------------------------------------------------------------------------------------------------------------------------------------------------------------------------------------------------------------------------------------------------------------------------------------------------------------------------------------------------------------------------------------------------------------------------------|
| CsTop1                              | <p><b>ATGAAACATCACCATCACCATCACCCCATGAGCGATTACGACATCCCCACTACTGAGAATCTTTATTTTCAGGGC</b><br/> <b>GCC</b>ATGGTGAAATGGCGTACCCTGGTCCACAATGGTGTGCGACTGCCGCCGCGTATCAACCGAAAGGTCTGTCA<br/> ATCAAAAATCCGTGGTGAACCCGTGAAACTGGATCCGCTGCAGGAAGAAATGGCGTATGCCCTGGGCACTGAAGAAA<br/> GATACGCCGTACGTGCAGGATCCGGTTTTTCAGAAAACTTTCTGACCGATTTTCTGAAAACGTTCAACGGCCGC<br/> TTTCAGGACGTTACCATCAACGAAATCGATTTTCAGCGAAGTCTACGAATACGTGGAACGTGAACGCCAACTGAAA<br/> CGGGATAAAGAATACCGTAAGAAAATTTCTGCCGAACGTAACCGCTGCGTGAAGAACTGAAAGCGCGCTACGGC<br/> TGGCCGAAATGGATGGTAAACGTTTCGAAATTCGAACTGGATGGTTGAACCCGCGGGCATCTTTATGGGTCGT<br/> GGTAATCATCCGCTGCGTGGTTCGTTGAAACCGCGTGTCTATGAAGAAGACATTACCCTGAATCTGGGTGAAGAT<br/> GCCCGGTCCCGCCGGTAATTGGGGTCAGATCGTGCATGATCAGACTCAATGTGGCTGGCCCGCTGGGATGAC<br/> AACTGACCGGTAAGAAAAATATGTGTGGCTGAGCGATACCGCAGATATTAACAGAAACCGCAGAAAAAGCAAA<br/> TAGCAGAAAGCAGAAATGCTGAAAACCATATTGATCGTGTGCGGAGAAAAATCTTTAAAAGGTCTGCGTAGCAAA<br/> GAACCGAAAAATGCGTGAATTGCCTGCGCTGTTATCTGATTGATCGTCTGGCAATGCGTGTGGTGATGAAAA<br/> GATCCGGATGAAGCAGATACCGTTGGTGAACCCACCTGCGTGTGAACATGTTAAACTGCTGGAAGATCGCATC<br/> GAGTTGATTTTCTGGGTAAAGTAGCGTTCTGTTGGCAGAAAAGCATTGATCTGCGTAAATGAACCTCCGGAGTT<br/> CGGCAGGTTTTTGAAGAAGTTCGGAAGGTAAAAAAGAAAGCGATCAGATTTTCCAGAAACATCAATAGCGGTCAT<br/> GTGAATCGTTTTCTGGGCAAAATGTTAAAGGCCCTGACCGCAAAAGTGTTCGTACCTATATCGCAACCAAAATC<br/> GTCAAAGATTTCCGCGCAGCAATTCGCGGTGAAAAAGTTACCAGCCAAGAAAAATTCATCTATTACGCCAAACTG<br/> GCCAATCTGAAAGCAGCAGAAGCACTGAATCATAAACGTGCACCGCCTAAAAATTTGGGAACAGAGCATCCAGAAA<br/> AAAGAGGAACGCGTTAAAAAACTGATGCAGCAGCTGCCGGAAGCCGAAAGCGAGAAAAAAAAGCACGTAATTGCA<br/> GAACGCTCGGAAAAAGCAGAAGCACTGAACCTGGATCTGGCAGTTAAAGTTTCGTGATTACAATCTGGCGACCAGCCTG<br/> CGTAACATATATTGATCCGCGTGTGTATAAAGCATGGGGTTCGTTATACCGGTTATGAATGGCGTAAAAATCTATACC<br/> GCAAGCCTGCTGCGTAAATTCAAATGGGTTGAAAAAGCCAGCGTTAAACATGTGCTGCAGTATTTTCCGCAAAAA<br/> CTGGCAAAAGATGTGGATAAAGGTATGCGAGTTAAAGCAGCCGTTTAA</p> |
| CsTOP1 <sup>HsLinker-</sup><br>Cter | <p><b>ATGAAACATCACCATCACCATCACCCCATGAGCGATTACGACATCCCCACTACTGAGAATCTTTATTTTCAGGGC</b><br/> <b>GCC</b>GTGAAATGGCGTACCCTGGTCCACAATGGTGTGCGACTGCCGCCGCGTATCAACCGAAAGGTCTGTCAATC<br/> AAAATCCGTGGTGAACCCGTGAAACTGGATCCGCTGCAGGAAGAAATGGCGTATGCCCTGGGCACTGAAGAAAGAT<br/> ACGCCGTACGTGCAGGATCCGGTTTTTCAGAAAACTTTCTGACCGATTTTCTGAAAACGTTCAACGGCCGCTTT<br/> CAGGACGTTACCATCAACGAAATCGATTTTCAGCGAAGTCTACGAATACGTGGAACGTGAACGCCAACTGAAAGCG<br/> GATAAAGAATACCGTAAGAAAATTTCTGCCGAACGTAACCGCTGCGTGAAGAACTGAAAGCGCGCTACGGCTGG<br/> GCCGAAATGGATGGTAAACGTTTCGAAATTCGAACTGGATGGTTGAACCCGCGGGCATCTTTATGGGTCGTGGT<br/> AATCATCCGCTGCGTGGTGGTTGAAACCCGCTGTCTATGAAGAAGACATTACCCTGAATCTGGGTGAAGATGCG<br/> CCGGTCCCGCCGGTAATTGGGGTCAGATCGTGCATGATCAGACTCAATGTGGCTGGCCCGCTGGGATGACAAA<br/> CTGACCGGTAAAGAAAAATATGTGTGGCTGAGTGTACGGCAGACATCAAAACAGAAACGTGATAATCCAAATAC<br/> GACAAAGCTGAAATGCTGAAAAATCATATTGATCGCGTTTCGTGAAAAATCTTCAAAGGCCCTGCGCTCGAAAGAA<br/> CCGAAAAATGCGTGAATTTGCTCTGGCGTGTACCTGATCAGCCGCTGCGGATGCGTGTGGCGATGAAAAAGAT<br/> CCGGACGAAGCAGACACCGCTCGGTGCTACCACGCTGCGCGTGAACACGTTAAAGTCTGGAAGATCGTATTGAA<br/> TTTGACTTCTGGGTAAAGTAGCGTGCCTGGCAGAAATCTATCGATCTGCGCAACGAACCGCGGAAGTTCGT<br/> CAAGTCTTTGAAGAACTGCTGGAAGGCAAGAAAGAAAGGCGATCAGATTTTCCAAAACATCAATAGTCGCCATGTT<br/> AATCGTTTTCTGGGCAAAATGTTAAAGTCTGACCGCAAAAGTCTTCCGCACCTACATCGCTACGAAAAATCGTG<br/> AAAGATTTTCTGGCGCCATTCCGCGTAAAAAGTTACGAGTCAGGAAAAATTCATCTATTACGCAAACTGGCT<br/> AACCTGAAAGCAGCTGAAGCGCTGAATCACCAGCGCGCACCGCCGAAACCTTTGAAAAATCCATGATGACCTG<br/> CAGACGAAAAATCGATGCGAAGAAAGAACTGGCCGATGACCGTGCAGCTGCGGACCTGAAATCAGCTAAAGCGGACGCC<br/> AAAGTGTGAAAGATGCGAAACCAAGAAAGTGGTTGAAAGCAAAAAGAAAGCGTCCAGCGCCCTGGAAGAACAA<br/> CTGATGAAACTGGAAGTGCAGGCAACGGATCGTGAAGAAAAACAACAAATTTGCTCTGGGCACCTCAAACCTGAAT<br/> TATCTGGACCCGCTATCAGGTTGGCTGGTGTAAAAATGGGGTGTTCGGATTGAAAAATCTACAATAAAACG<br/> CAGCGTAAAAAATTTGCTTGGGCTATTGATATGGCGGATGAAGACTATGAATTTCAA</p>    |

**Supplementary Table 2: primer sequences**

Sequence of the DNA oligonucleotides used in this study.

| Name                  | Sequence                                                            | Construct                               |
|-----------------------|---------------------------------------------------------------------|-----------------------------------------|
| CsFL154R              | 5'-TAATCATCCGAAGCGTGGTCGTTG-3'                                      | L154K point mutation in CsTop1          |
| CsRL154R              | 5'-CCACGACCCATAAAGATG-3'                                            |                                         |
| CsFL399RL402R         | 5'-CGCTTCAGCTGCTTTCCGGTTAGCCCGTT<br>TTGCGTAATAGAT-3'                | L399R L402R point mutations in CsTop1   |
| CsRFL399L402R         | 5'-ATCTATTACGAAAACGGGCTAACCGGA<br>AAGCAGCTGAAGCG-3'                 |                                         |
| CsFHsCat              | 5' CTACTGGATCCGCGTGTGTATAAAAG-3'                                    | CsTOP1 <sup>HsTyr</sup> point mutations |
| CRFHsCat              | 5' TTCAGTTTGCTGGTCGCCAAGATTGTA-3'                                   |                                         |
| Q5SDM_12/7/20<br>16 F | 5'-GAAATGGTGGGAAGAAGAGCGCTATCCT<br>GAAGGCATCGTGAAATGGCGTACCCTG-3'   | CsTOP1 <sup>HsNter</sup> insertion      |
| Q5SDM_12/7/20<br>16 R | 5'- CACTTCTGTTCCTCTTCTTTCTTCGGCTTC<br>TTTTTCTTGATGGTGTATGGTGTATG-3' |                                         |
| Q5SDM_4/13/20<br>19 F | 5'-CCCTAGCGCAGATATTAACAGAAACG-<br>3'                                | Hinge-1 point mutations (MLNPS)         |
| Q5SDM_4/13/20<br>19 R | 5'-TTCAGCATCACATATTTTTCTTACC GG-3'                                  |                                         |
| Q5SDM_4/13/20<br>19 F | 5'-CCTCCCGCAGATATTAACAGAAACG-3'                                     | Hinge-2 point mutations (WLSPP)         |
| Q5SDM_4/13/20<br>19 R | 5'-GCTCAGCCACACATATTTTTCTTACC-3'                                    |                                         |
| CsTop1WLSGGf<br>wd    | 5'- AAAAATATGTGTGGCTGAGCGGTGGCGC<br>AGATATTAACAGAAACG-3'            | Hinge-3 point mutations (WLSGG)         |
| CsTop1WLSGGr<br>ev    | 5'- CGTTTCTGTTAATATCTGCGCCACCGCT<br>CAGCCACACATATTTTT-3'            |                                         |
| CsTop1Y207Afw<br>d    | 5'- CTGACCGGTAAAGAAAAAGCTGTGTGG<br>CTGAGCGATAC-3'                   | Y207A point mutation in CsTop1          |
| CsTop1Y207Arev        | 5'-GTATCGCTCAGCCACACAGCTTTTTCTTT<br>ACCGGTCAG-3'                    |                                         |

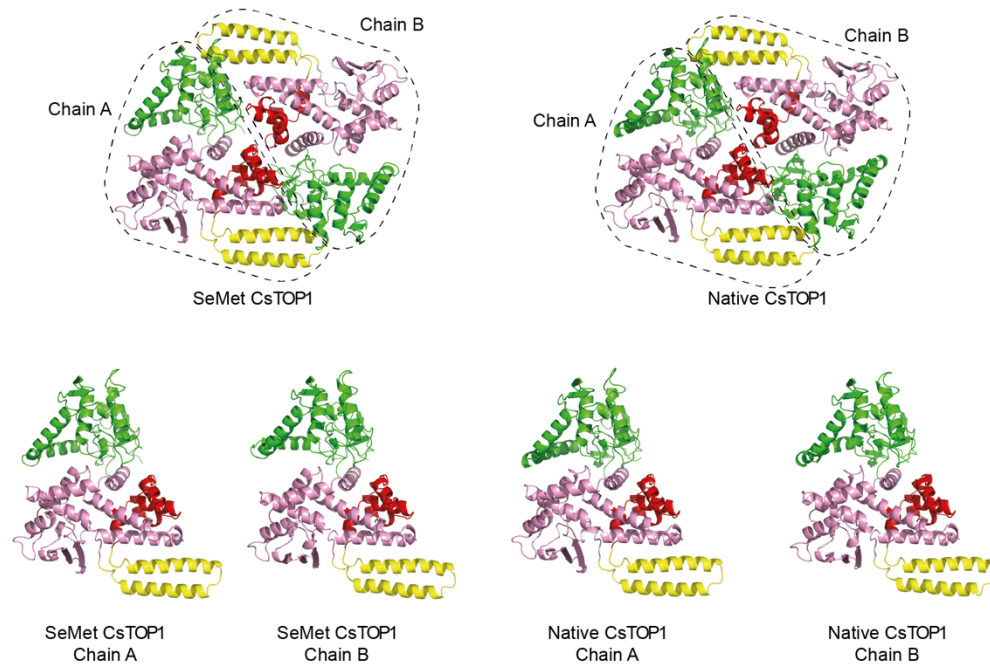

**Supplementary Figure 1: CsTOP1 structure in one asymmetric unit.**

Cartoon representation of the two CsTOP1 chains found in one asymmetric unit in SeMet CsTOP1 and native CsTOP1 crystals. The different subunits were further superposed. Coloring scheme is the same as Fig. 1.

|                            |                                                                                             |     |            |
|----------------------------|---------------------------------------------------------------------------------------------|-----|------------|
| Caldiarchaeum_subterraneum | -----MVKWRTLHNGVALPPYQPKGLSIRGETVTKLDPLQEEMAYAWALK                                          | 48  |            |
| Nitrososphaera_viennensis  | MEEVAAAPQPQARIRWSSLVHRGVAFPEHQPRGITISIKGEKVALNADQELVYAWAKK                                  | 60  |            |
| Crenarchaeota_archaeon     | -----MKWKTLOHNGILFPFAFESQGIKIKVKEKVLDDLQEMIIYQWAKK                                          | 47  |            |
| Heimdallarchaeota_archaeon | -----MTKIEQLIHNGVLLSE-IPYLELSIEINGKVKHLEKSEQMAIAWVRK                                        | 47  |            |
|                            | : * * . : : : . : . : * : * . * * : : * . *                                                 |     |            |
| Caldiarchaeum_subterraneum | KDTPYVQDPVFQKNFLTDFLKTFNFRQ--DVTINEIDFSEVYEVVERERQLKA-----                                  | 100 |            |
| Nitrososphaera_viennensis  | KDTHYVQDPVFQSNFLDLKPLPEKPRKADLKI SDPDFSQAFLADEKMMKEREKERI                                   | 120 |            |
| Crenarchaeota_archaeon     | KDTPYAQDKVFNFTADFAKTLDPKFK--GIKYEDIDFSEAFKVVDEKDLKE-----                                    | 99  |            |
| Heimdallarchaeota_archaeon | LSTVYVEDP IFCNKYFKDFGEEI----GDASLTDNDIDFSEVIAVVEKQKEIRD-----                                | 97  | CAP domain |
|                            | . * . : * : * . * : * : : . . : : * * : . . : : : :                                         |     |            |
| Caldiarchaeum_subterraneum | ---DKEYRKKISAERKRLREELKARYGWAEMDGKRFEIANWVPEPPIFMGRGNHPLRGR                                 | 157 |            |
| Nitrososphaera_viennensis  | KNLPREKKMAEAKKAERERLALYGVAVDQEVDIANWLVPEPGLFMGRGHPLRGR                                      | 180 |            |
| Crenarchaeota_archaeon     | -MMTKEEKSLAAKRKLEKMKYKAVMDGQEVVANYMAEPPGIFIGRGEHPLRGR                                       | 158 |            |
| Heimdallarchaeota_archaeon | -AKTKEQKQEREERKVIREFQLKEKYGATLDGAQVEISNYTAEPSIFMGRGEHPMRGK                                  | 156 |            |
|                            | : * : . : * * * : * * * : * * * : * * * : * * * : * * * : * * * :                           |     |            |
| Caldiarchaeum_subterraneum | WKPRVYEEDITLNLGEDAPVPPGNWQIVHDHDSMWLARWDDKLTGKEKYVWLSDTADIK                                 | 217 |            |
| Nitrososphaera_viennensis  | WKPRVQPQDVTLNLGEDAPVPEGEWKEIVHDHTS T W L A T M E N L T E K R K Y V W L H D S S E L R        | 240 |            |
| Crenarchaeota_archaeon     | WKKRVTPEVDVILNLGDAKVPVPGWGI I H D Q N S M W L A S W M D D L T Q R K R Y V W L A D T A G L K | 218 |            |
| Heimdallarchaeota_archaeon | WKEGPSKADIVLNLSPAPRPEGEWLEIVWEPECLWIAKWTDKLSGKTKYVWLSDTTPIK                                 | 216 | Hinge      |
|                            | ** * : * * * : * * * : * * * : * * * : * * * : * * * : * * * : * * * :                      |     |            |
| Caldiarchaeum_subterraneum | QKRDKSKYDKAEMLENHIDRVREKIFKGLRSKEPKMREIALACYLIDRLAMRVGDEKDPD                                | 277 |            |
| Nitrososphaera_viennensis  | QGNDKAKYDKALNLAQQLGKVEKEIMRKMKSND---KAATAAYLIFKLAMRVGDEKDPD                                 | 297 |            |
| Crenarchaeota_archaeon     | QERDQAKYDKATKLAKETEKIKNSIVKDMKSKDKLSRIATACYLIYRTAMRVGDEKDPD                                 | 278 |            |
| Heimdallarchaeota_archaeon | QDREIEKYDKANLVGDNLETIRNQIMSAISGSDKRNKKVATACYIIDLHNI RVGDEKDPD                               | 276 |            |
|                            | * . : * * * * : . . : . : . : . : . : . : . : * * * : * * * : * * * * * :                   |     |            |
| Caldiarchaeum_subterraneum | EADTVGATTLRVEHVKLE---DRIEFDLKGDSVVRQKSIDLRNEP-PEVRQVFEELL                                   | 332 |            |
| Nitrososphaera_viennensis  | EADTVGASTLRVEHIKFPQNGKQYIEFNFLGKDSVPWQKTLVNSDTRALYDNLRFNM                                   | 357 |            |
| Crenarchaeota_archaeon     | EADTVGATTLRKEHIKLTG---KAI E F D L G K D S V R W Q E T V P A E G Q D - K Q F Y D N L E K L I | 333 |            |
| Heimdallarchaeota_archaeon | EADTVGATTLRPEHIKING---STVIFDFLKGDSVVEWHKEREFFEIFVNSLQELINEAN                                | 332 | CAT domain |
|                            | * * * * * : * * * * : . : * * * * * : * * * * * : . : . : . :                               |     |            |
| Caldiarchaeum_subterraneum | EGKKEGDIQFNINSRHVNRFLGKIVKGLTAKVFTYIATKIVKDFLAAIPRE--KVTSQ                                  | 390 |            |
| Nitrososphaera_viennensis  | KGKPKDQIFDIDINSRKVNFAFFTVMPLTAKVFTCIATKVVQALVNPPIKVDNRNSQE                                  | 417 |            |
| Crenarchaeota_archaeon     | ANKKPKDEIFDGITSRHVNAIYSSIVKGLTAKVFTYLA T V N S Y L K N H D N V -- K S K S A                 | 391 |            |
| Heimdallarchaeota_archaeon | ESGNDKQIFSDIGSRHVNAFDEIVDGLTAKVFTYHATTVVRNFLDESVD--PADPD                                    | 390 |            |
|                            | . : . : * * . * * * * : . : * * * * * * * : * * . . . *                                     |     |            |
| Caldiarchaeum_subterraneum | EKFIIYAKLANLKAEEALNHKRAPPKN-----WEQSIQKKEE-----                                             | 427 |            |
| Nitrososphaera_viennensis  | SDKVYVAKSANLKAIECNHKKGVDPKNPAAKKAAEKFEAVAKRNQ-----                                          | 464 |            |
| Crenarchaeota_archaeon     | NEKLYHAKMANLAAKMCNHRKRTI PKT-----YETALQKKE-----                                             | 428 |            |
| Heimdallarchaeota_archaeon | FAKKEAAMNREAAVECTHKKQEPKN-----WENRMQKYRERKLGQERIEKAN                                        | 440 |            |
|                            | * * * : * * * : * * * : * * * : * * * : * * * : * * * : * * * :                             |     |            |
| Caldiarchaeum_subterraneum | -----RVKKLMQO--L-----                                                                       | 436 |            |
| Nitrososphaera_viennensis  | -----ATAELEKQVAA-----                                                                       | 475 |            |
| Crenarchaeota_archaeon     | -----TLKKAKES--T-----                                                                       | 437 |            |
| Heimdallarchaeota_archaeon | DNQTKREERIEELKGNLKLRRKQVREQEFLAQTKEDLAVIKNMSTNFATQREKDRHKNA                                 | 500 | Linker     |
|                            | : : .                                                                                       |     |            |
| Caldiarchaeum_subterraneum | -----REAESEK-----KK---ARIAERLEKAEINLNDLA                                                    | 462 |            |
| Nitrososphaera_viennensis  | -----GNWKTET-----QE---KRLKERLAKLKMQLKLQ                                                     | 501 |            |
| Crenarchaeota_archaeon     | -----PKTEK-----QK---EKLKDRIEKLKIQIDLQ                                                       | 461 |            |
| Heimdallarchaeota_archaeon | IVKAKKKIETVKKKVVAEKRVETAKNQVERGKNSVGTAKERVYKAKLALKKIESQEKIS                                 | 560 |            |
|                            | . * . : * * * : * * * : * * * : * * * : * * * : * * * : * * * :                             |     |            |
| Caldiarchaeum_subterraneum | VKVRDYNLATSRLNYIDPRVYKAWGRYTGVEWRKIYASLLRKFVWEKASVKHV--LQY                                  | 520 |            |
| Nitrososphaera_viennensis  | QETRDYNLGTSLRNYIDPRVMKAWLNVLDLWTKVYATLQKRFKWEVGYEKNY--SRF                                   | 559 |            |
| Crenarchaeota_archaeon     | EKTQDYNLGTSLRNYIDPRVFAWTEVGAWEKLYTAALQKFLVWKSADVWVKDISQQ                                    | 521 |            |
| Heimdallarchaeota_archaeon | KKTKTNLGTSLKSYIDPRVYDVGKVEDYDWRNYYSNALQRKFSWVERDADE-----                                    | 613 | C-terminal |
|                            | . : . : * * * * : * * * * * * * * * * * * * * * * * * * * * * * * * * * * * :               |     |            |
| Caldiarchaeum_subterraneum | FAEKLAKVDKGMQVKAIV                                                                          | 539 |            |
| Nitrososphaera_viennensis  | YP-----                                                                                     | 561 |            |
| Crenarchaeota_archaeon     | Y-----                                                                                      | 522 |            |
| Heimdallarchaeota_archaeon | -----                                                                                       | 613 |            |

## Supplementary Figure 2: Alignment of archaeal TOP1 sequences.

Alignment of four archaeal TOP1 sequences from different phyla including *Caldiarchaeum subtarreneum* (Aigarchaeota), *Nitrososphaera viennensis* (Thaumarchaeota), *Crenarchaeota* archaeon (Crenarchaeota) and *Heimdallarchaeota* archaeon (Heimdallarchaeota, Asgard).

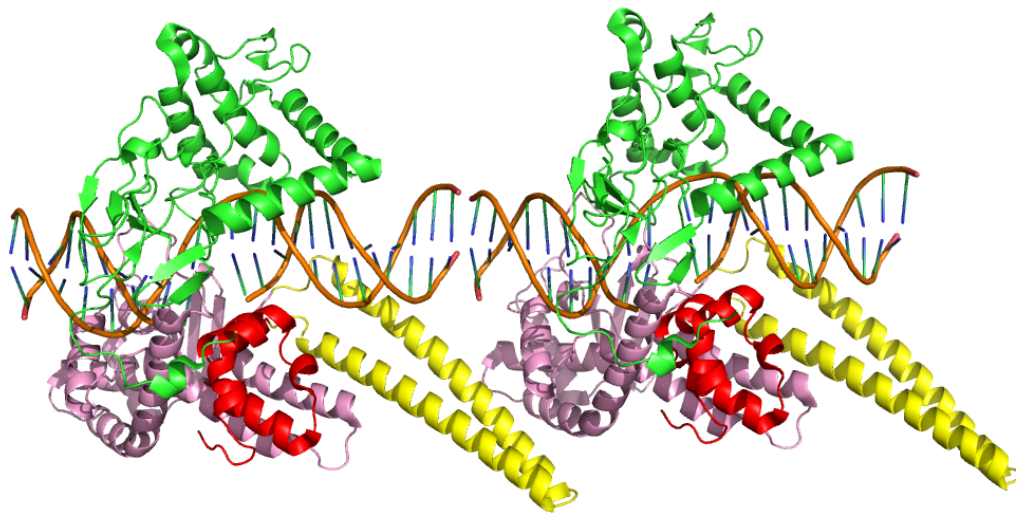

**Supplementary Figure 3: Packing artifact of HsTOP1-DNA.**

Cartoon representation of two complexes within the packing of HsTop1-DNA crystal structure (PDB 1K4T). The linker domain (yellow) of one TOP1 is pushed away from the DNA by the CAT domain (pink) of a neighboring TOP1 molecule. Coloring scheme is the same as Fig. 1.

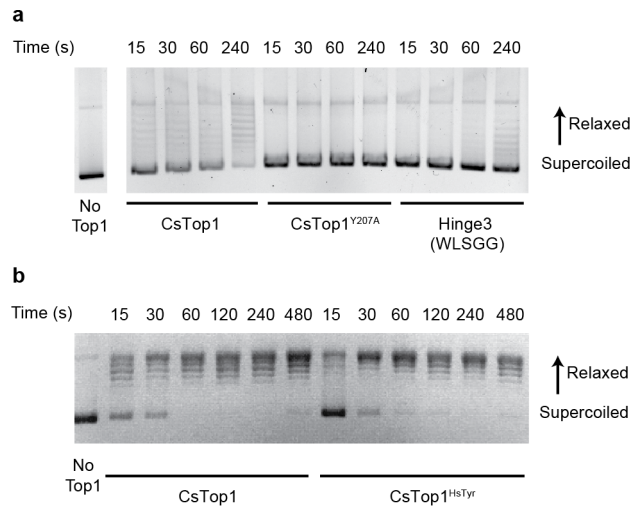

**Supplementary Figure 4: Relaxation of supercoiled DNA by mutated CsTop1.**

**a)** Relaxation assay with CsTop1, CsTop1(Y207A) and CsTop1 (Hinge3, WLSGG). **b)** Relaxation assay with CsTop1 and CsTop1(HsTyr). The kinetics of relaxation is shown for each construct. Both experiments were done twice independently.
